# Supplementary material for: Band-tail states meditated visible-light-driven overall water splitting in Y2Ti2O5S2 photocatalyst
Source: Royal Society of Chemistry journal article supplement (doi:10.1039/d2ta06315h), 2022-01-01
Supplement: d2ta06315h1.pdf [file d2ta06315h1.pdf]

## Supplementary Information

### Band-tail states mediated visible-light-driven water splitting in $\text{Y}_2\text{Ti}_2\text{O}_5\text{S}_2$ photocatalyst

Ronghua Li,<sup>a</sup> Zhengdi Zha,<sup>a</sup> Yanning Zhang,<sup>a</sup> Minji Yang,<sup>a</sup> Lihua Lin,<sup>b</sup> Qian Wang,<sup>c,d</sup>  
Takashi Hisatomi,<sup>b</sup> Mamiko Nakabayashi,<sup>e</sup> Naoya Shibata,<sup>e</sup> Kazunari Domen<sup>b,f</sup> and  
Yanbo Li<sup>a,\*</sup>

<sup>a</sup>Institute of Fundamental and Frontier Sciences, University of Electronic Science and  
Technology of China, Chengdu 610054, China.

<sup>b</sup>Research Initiative for Supra-Materials (RISM), Shinshu University, Nagano 380-  
8553, Japan

<sup>c</sup>Graduate School of Engineering, Nagoya University, Nagoya 464-8603, Japan

<sup>d</sup>Institute for Advanced Research, Nagoya University, Nagoya 464-8601, Japan

<sup>e</sup>Institute of Engineering Innovation, The University of Tokyo, Tokyo 113-8656, Japan.

<sup>f</sup>Office of University Professors, The University of Tokyo, Tokyo 113-8656, Japan

\*Corresponding author, email: [yanboli@uestc.edu.cn](mailto:yanboli@uestc.edu.cn)

## Methods

**1. Asymmetric double sigmoidal (Asym2Sig) model for PL fitting.** PL spectrum measured in Fig. 2a was fitted using asymmetric double sigmoidal (Asym2Sig) model<sup>1</sup>:

$$y = y_0 + A \times \frac{1}{1 + e^{-\frac{x - x_c + \frac{W_1}{2}}{W_2}}} \times \left( 1 - \frac{1}{1 + e^{-\frac{x - x_c - \frac{W_1}{2}}{W_3}}} \right) \quad (\text{S1})$$

where  $y_0$  and  $A$  are constants,  $x_c$  is the peak energy,  $W_1$  is the full width at half maximum,  $W_2$  is variance of low-energy side, and  $W_3$  is variance of high-energy side.

**2. Calculation of defect formation energy.** Defect formation energy  $\Delta H$  in the process of forming compound AB from element A and B is expressed as:  $E(A) + E(B) + \Delta H = E(AB)$ . When studying a defect system, a system (host) without defects should be chosen as a reference first. For a defect  $\alpha$  with charge  $q$ , its formation energy  $\Delta H^f(\alpha, q)$  can be rewritten as<sup>2</sup>:

$$\Delta H^f(\alpha, q) = E(\alpha, q) - E(\text{host}) - \sum_i n_i (E_i + \mu_i) + q(E_f + E_{VBM}(\text{host}) + \Delta V) \quad (\text{S2})$$

where  $E(\alpha, q)$  is the total energy of the defect system,  $E(\text{host})$  is the total energy of the reference system,  $E_{VBM}$  is the VBM energy of reference system,  $E_f$  is the Fermi level referenced to the VBM of the host,  $E_i$  is the energy of the corresponding simple substance, and  $\mu_i$  is the chemical potential of the element.  $\Delta V$  is the correction term to align the reference potential in our defect supercell with that in the bulk. According to Eq. (S2), in order to calculate the formation energy of intrinsic point defects in  $Y_2Ti_2O_5S_2$ , the chemical potential range of each constituent element should be determined first.

The chemical potential is thermodynamically limited by a series of conditions:

(i) the sum of the chemical potentials of each component element must be in equilibrium with the compound formation energy, that is, it must satisfy the equation:

$$2\mu_Y + 2\mu_{Ti} + 2\mu_S + 5\mu_O = \Delta H_f^{Y_2Ti_2O_5S_2} \quad (\text{S3})$$

(ii)  $\mu_S=0$  means that sulfur is abundant enough to form elemental sulfur, but it should need to avoid this situation, which requires the chemical potential of the four elements to be less than 0 ( $\mu_S < 0$ ,  $\mu_O < 0$ ,  $\mu_Y < 0$ , and  $\mu_{Ti} < 0$ ).

(iii) to avoid the formation of secondary phases, the chemical potential also needs to satisfy the following inequalities:

$$2\mu_Y + 3\mu_O < \Delta H_f^{Y_2O_3} \quad (S4)$$

$$\mu_{Ti} + 2\mu_O < \Delta H_f^{TiO_2} \quad (S5)$$

$$\mu_{Ti} + 2\mu_S < \Delta H_f^{TiS_2} \quad (S6)$$

$$2\mu_Y + 2\mu_S + \mu_O < \Delta H_f^{Y_2O_3O} \quad (S7)$$

Under these established constraints, the chemical potential ranges of Y, Ti, and S that stabilize the  $Y_2Ti_2O_5S_2$  compound are incorporated in a polyhedron of three-dimensional  $(\mu_Y, \mu_{Ti}, \mu_S)$  space.

## References

1. J. Krustok, H. Collan, M. Yakushev and K. Hjelt, *Phys. Scripta.*, 1999, **1999**, 179.
2. S. Chen, J.-H. Yang, X. G. Gong, A. Walsh and S.-H. Wei, *Phys. Rev. B*, 2010, **81**, 245204.

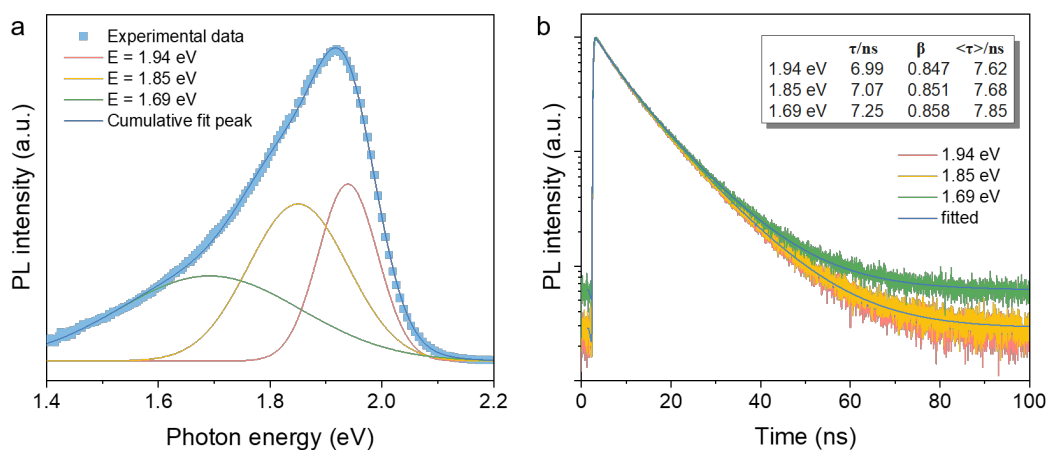

**Fig. S1** Room-temperature PL spectra of the  $\text{Y}_2\text{Ti}_2\text{O}_5\text{S}_2$  powder. (a) Room-temperature PL spectrum of  $\text{Y}_2\text{Ti}_2\text{O}_5\text{S}_2$  powder measured under 510 nm laser excitation. The spectrum can be well fitted by three Gaussian bands with peaks at 1.69 eV, 1.85 eV and 1.94 eV. (b) Room temperature TRPL spectra measured at 1.69 eV, 1.85 eV and 1.94 eV. Inset shows the fitting results using stretched exponential decay.

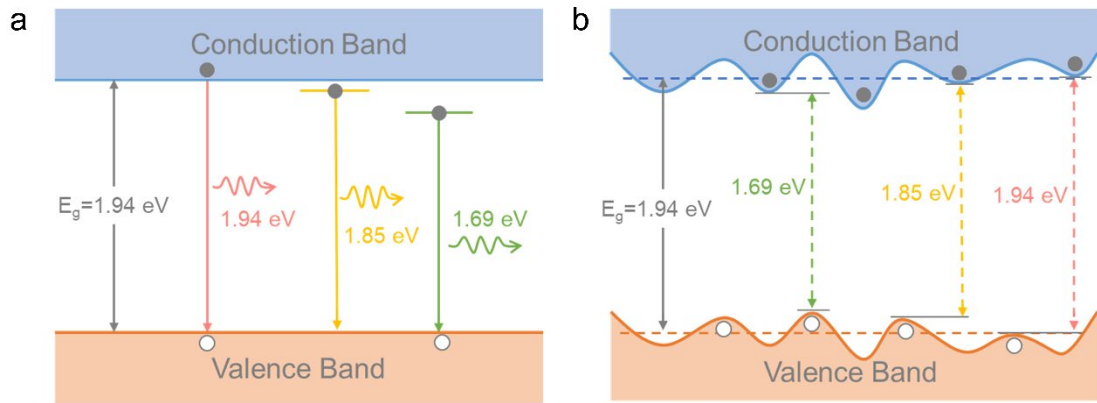

**Fig. S2** Schematic diagrams of PL mechanism corresponding to different room-temperature emission mechanisms in  $\text{Y}_2\text{Ti}_2\text{O}_5\text{S}_2$ . (a) Some of the possible PL processes in  $\text{Y}_2\text{Ti}_2\text{O}_5\text{S}_2$ . The  $1.94 \text{ eV}$  emission is attributed to recombination of conduction electrons with valence holes. The  $1.85 \text{ eV}$  and  $1.69 \text{ eV}$  emissions are attributed to recombination between conduction electrons and excited holes through defect levels. (b) Schematic drawing of the mechanism of band-tail state recombination. The grey and white circles represent electrons and holes, respectively.

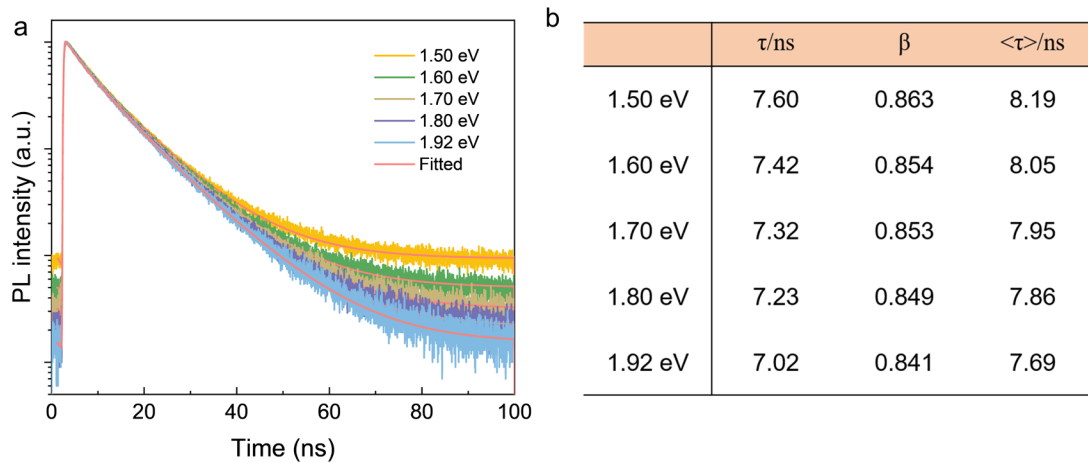

**Fig. S3** Room-temperature TRPL spectra of the  $\text{Y}_2\text{Ti}_2\text{O}_5\text{S}_2$  powder measured at different position. (a) Room-temperature TRPL spectrum measured under 510 nm laser excitation. (b) The fitted parameters for the TRPL decay at different position using stretched exponential decay.

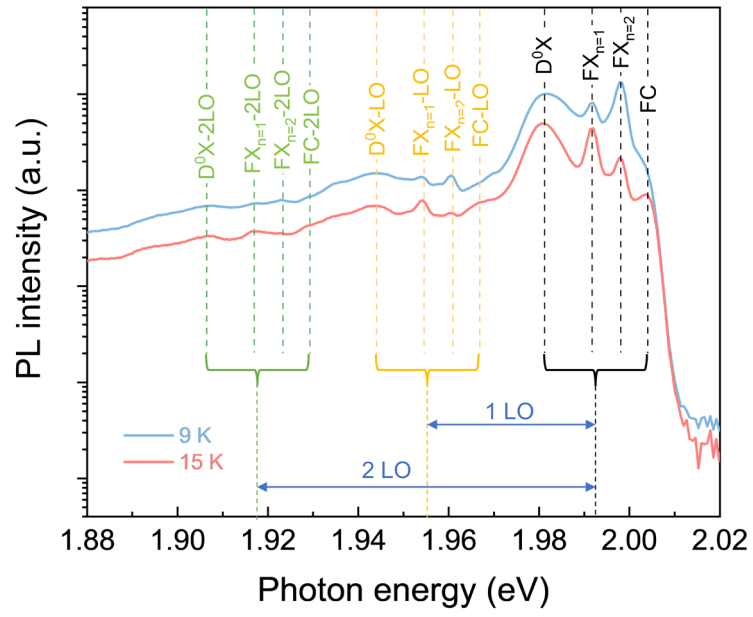

**Fig. S4** Low-temperature PL spectra of  $\text{Y}_2\text{Ti}_2\text{O}_5\text{S}_2$  powder. The PL spectra were measured under 420 nm laser excitation at 9 and 15 K.

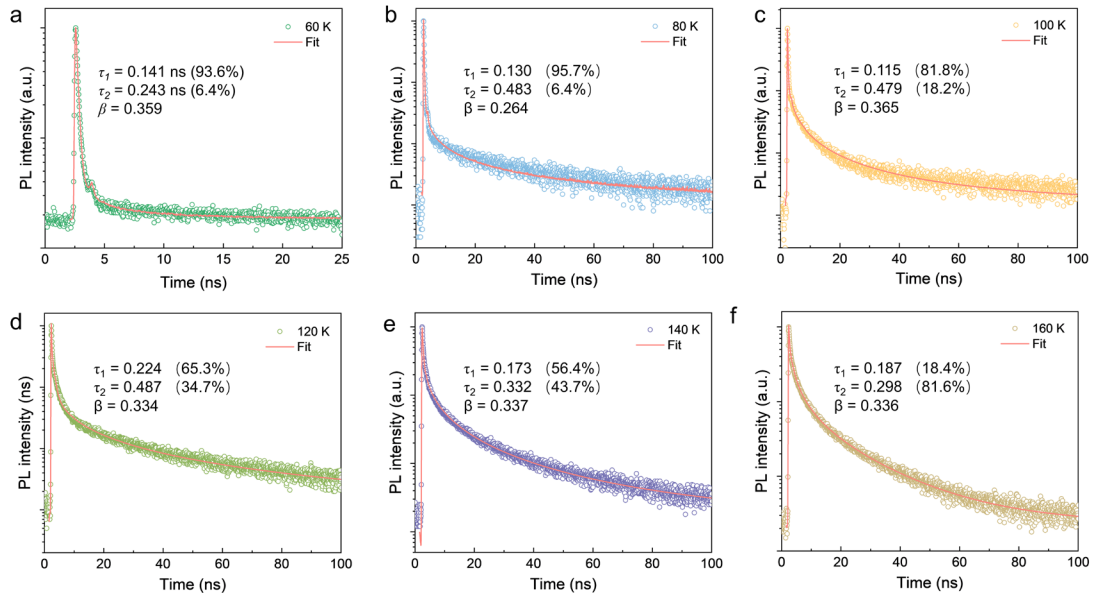

**Fig. S5** TRPL decay curves of  $\text{Y}_2\text{Ti}_2\text{O}_5\text{S}_2$  measured at different temperatures between 60-160 K. (a) 60 K. (b) 80 K. (c) 100 K. (d) 120 K. (e) 140 K. (f) 160 K. Circles indicate experimental data, and the red line shows the fitted curve using thermalized stretching exponential decay. The detailed fitting parameters are listed in Table S2.



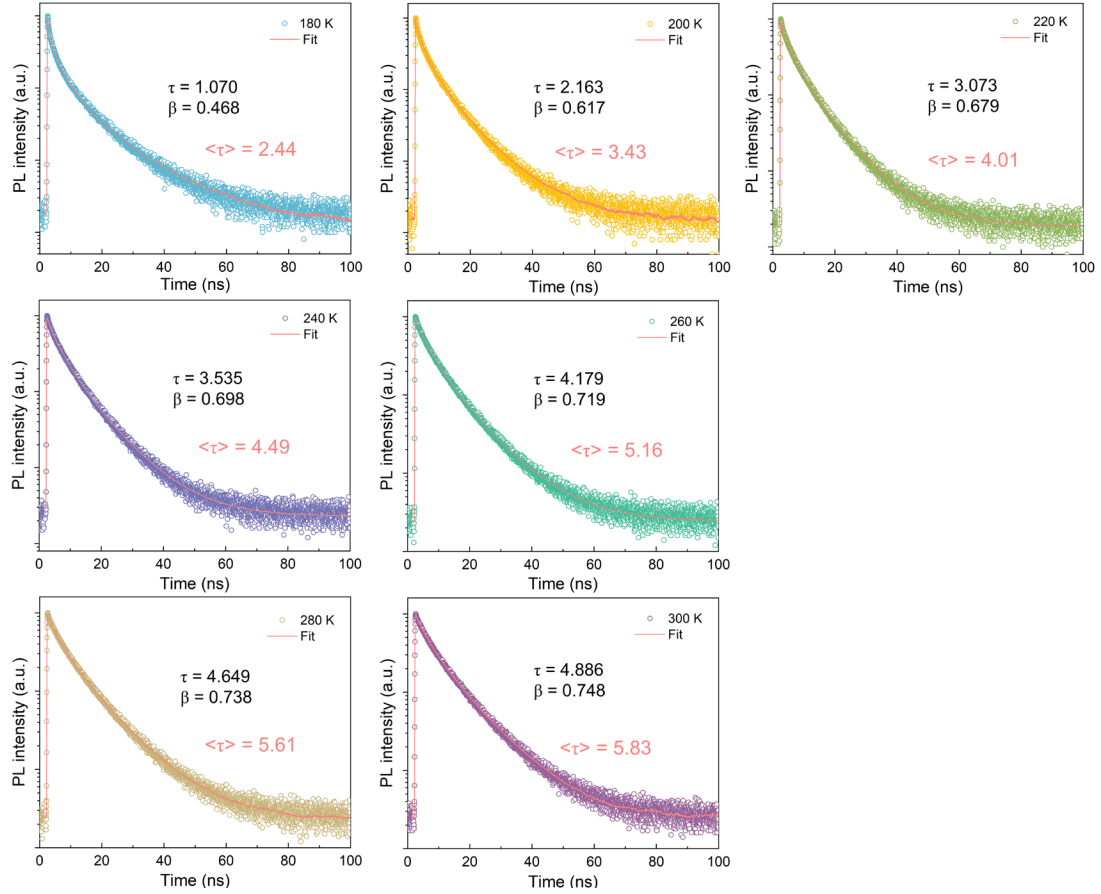

**Fig. S6** TRPL decay curves of  $\text{Y}_2\text{Ti}_2\text{O}_5\text{S}_2$  measured at different temperatures between 180-300 K. (a) 180 K. (b) 200 K. (c) 220 K. (d) 240 K. (e) 260 K. (f) 280 K. (g) 300 K. Circles indicate experimental data, and the red line shows the fitted curve using stretched exponential decay. The detailed fitting parameters are listed in Table S3.

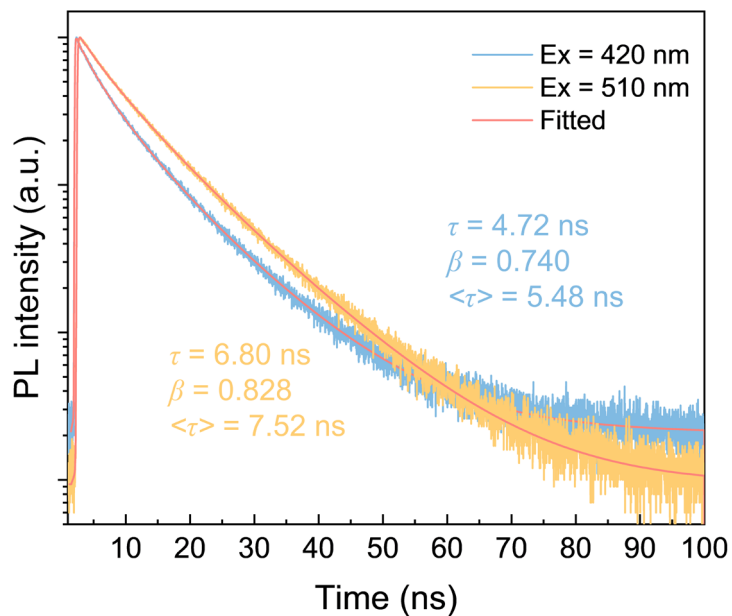

**Fig. S7** TRPL decay curves of  $\text{Y}_2\text{Ti}_2\text{O}_5\text{S}_2$  measured under different excitation lasers. The curves were measured at room temperature in air under 420 and 510 nm laser excitation. The red line shows the fitting of the decay with a stretched exponential decay (Eq. (1)). Inset shows the fitted parameters of the stretched exponential decay.

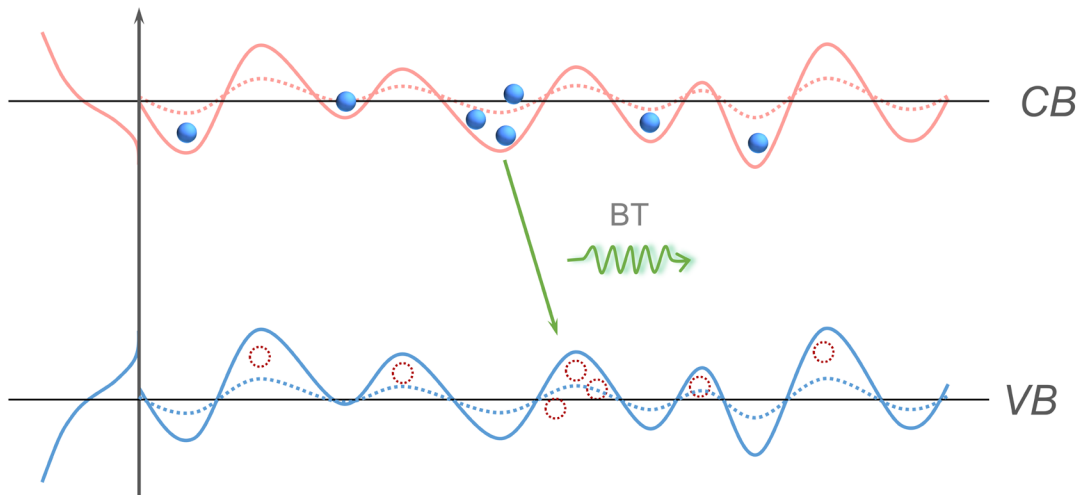

**Fig. S8** Schematic diagrams of the mechanism of band-tail recombination in  $Y_2Ti_2O_5S_2$ . The amplitude of the spatial potential fluctuation increases with increasing temperature. The dashed line represents the band structure at low temperature, while the solid line represents the band structure at high temperature.

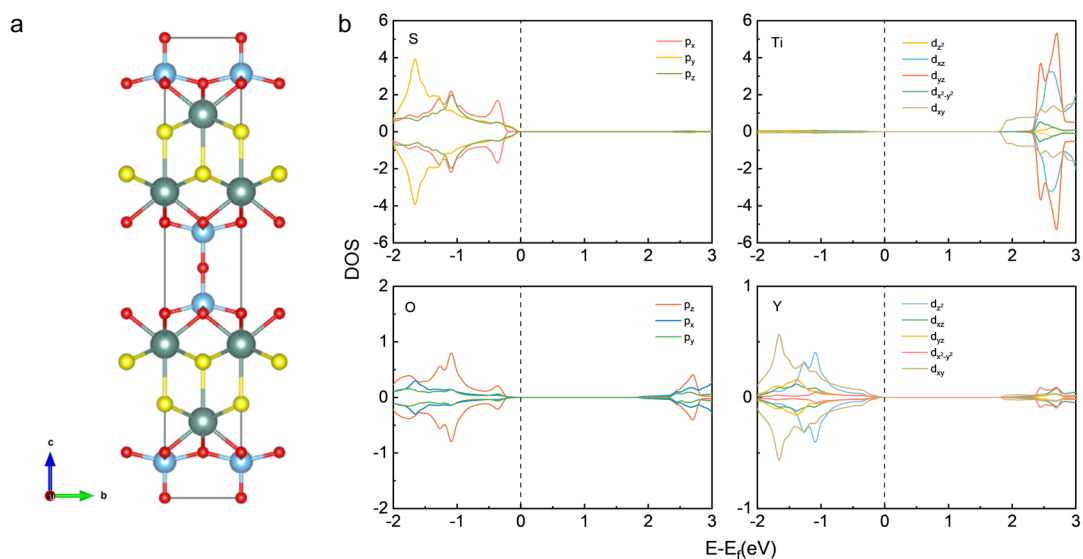

**Fig. S9** DFT calculations of  $\text{Y}_2\text{Ti}_2\text{O}_5\text{S}_2$  photocatalyst. (a) Atomic structure of  $\text{Y}_2\text{Ti}_2\text{O}_5\text{S}_2$ . The red, blue, green, and yellow balls represent O, Ti, Y, and S atoms, respectively.  $\text{Y}_2\text{Ti}_2\text{O}_5\text{S}_2$  is a layered oxysulfide consisting of an alternating stacking of  $\text{Ti}_2\text{O}_5$  double layer unit and  $\text{Y}_2\text{S}_2$  layer unit with the space group of  $I4/mmm$ . Our PBE+U calculated lattice constants:  $a = b = 3.847 \text{ \AA}$  and  $c = 23.168 \text{ \AA}$ . (b) Partial density of states of S-3p, Ti-3d, O-2p, and Y-4d orbitals. The Fermi level is set to zero.

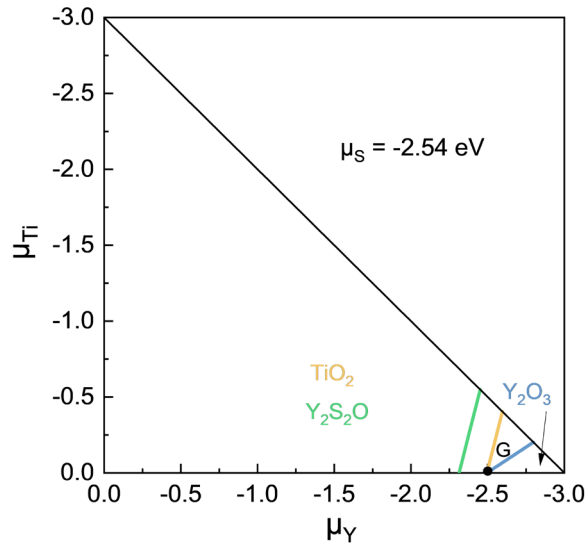

**Fig. S10** The calculated stable chemical-potential region in the  $\mu_S = -2.54 \text{ eV}$  plane. The stable region on the  $\mu_S = -2.54 \text{ eV}$  section consists only one point (G point), and a slight deviation of the chemical potential on this plane produces a secondary phase of  $Y_2O_3$ ,  $TiO_2$ , which indicates that G is one of the end points of a three-dimensional stable polyhedron.

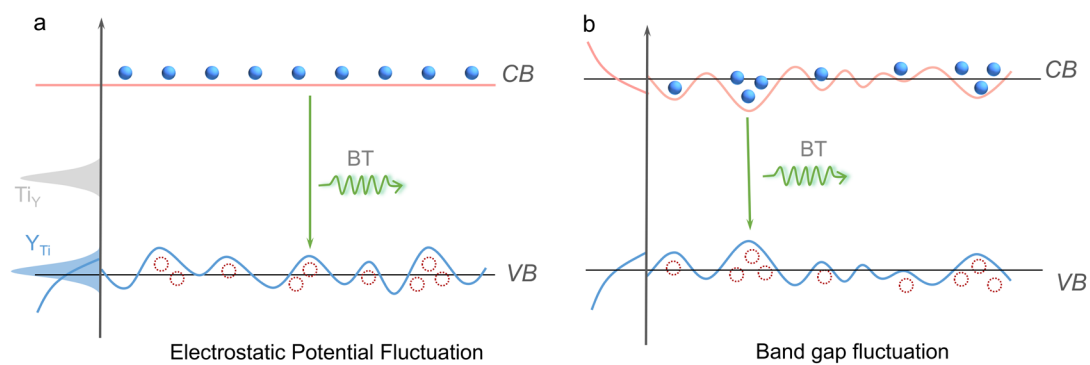

**Fig. S11** Schematic diagrams of possible mechanisms of band-tail states transitions in  $Y_2Ti_2O_5S_2$ . (a), Electrostatic potential fluctuation caused by the random distribution of  $Y_{Ti}$  antisites. (b) Band gap fluctuation caused by the random distribution of  $S_O$  and  $O_S$  antisites.

**Table S1** Fitting parameters for the TRPL decay curves measured at low temperature.

|                                      | $I_1$ (%) | $\tau_1$ (ns)      | $I_2$ (%) | $\tau_2$ (ns)      | $\beta$ | $\langle\tau_2\rangle$ (ns) | $\langle\tau\rangle$ (ns) |
|--------------------------------------|-----------|--------------------|-----------|--------------------|---------|-----------------------------|---------------------------|
| 9 K-1.997 eV<br>(FX <sub>n=2</sub> ) | 4.1       | 39.05              | 95.9      | 18.82              | 0.862   | 20.30                       | 21.07                     |
| 9 K-1.990 eV<br>(FX <sub>n=1</sub> ) | 61.8      | 5.72               | 38.2      | 8.78               | 0.494   | 17.95                       | 10.39                     |
| 9 K-1.980 eV<br>(D <sup>0</sup> X)   | 5.1       | $4.95 \times 10^5$ | 94.9      | $6.73 \times 10^3$ | 0.409   | $2.11 \times 10^4$          | $4.53 \times 10^4$        |
| 15 K-2.003 eV<br>(FC)                | 2.3       | 2.34               | 97.7      | 0.12               | 0.675   | 0.15                        | 0.20                      |

$\tau_i$  is the decay time and  $I_i$  is the fractional intensity of each decay channel;  $\langle\tau_2\rangle$  is the average lifetime of the stretched exponential decay process:  $\langle\tau_2\rangle = \frac{\tau_2}{\beta} \Gamma(\frac{1}{\beta})$ ; and  $\langle\tau\rangle$  is intensity-weighted average lifetime of the total decay process:  $\langle\tau\rangle = I_1\tau_1 + I_2\langle\tau_2\rangle$

**Table S2** Fitting parameters for the TRPL decay curves measured at different temperatures ranging from 60 to 160 K.

| Temperature (K) | I <sub>1</sub> (%) | τ <sub>1</sub> (ns) | I <sub>2</sub> (%) | τ <sub>2</sub> (ns) | β     | <τ <sub>2</sub> > (ns) | <τ> (ns) |
|-----------------|--------------------|---------------------|--------------------|---------------------|-------|------------------------|----------|
| 60              | 93.6               | 0.141               | 6.4                | 0.243               | 0.359 | 1.12                   | 0.20     |
| 80              | 95.7               | 0.130               | 4.3                | 0.483               | 0.264 | 8.46                   | 0.49     |
| 100             | 81.8               | 0.115               | 18.2               | 0.479               | 0.365 | 2.09                   | 0.47     |
| 120             | 65.3               | 0.224               | 34.7               | 0.487               | 0.334 | 2.89                   | 1.15     |
| 140             | 56.4               | 0.173               | 43.7               | 0.332               | 0.337 | 2.15                   | 1.04     |
| 160             | 18.4               | 0.187               | 81.6               | 0.298               | 0.336 | 1.74                   | 1.45     |

τ<sub>i</sub> is the decay time and I<sub>i</sub> is the fractional intensity of each decay channel; <τ<sub>2</sub>> is the average lifetime of the stretched exponential decay process:  $\langle \tau_2 \rangle = \frac{\tau_2}{\beta} \Gamma(\frac{1}{\beta})$ ; and <τ> is intensity-weighted average lifetime of the total decay process:  $\langle \tau \rangle = I_1 \tau_1 + I_2 \langle \tau_2 \rangle$



**Table S3** Fitting parameters for the TRPL decay curves measured at different temperatures ranging from 180 to 300 K.

| Temperature (K) | $\tau_0$ (ns) | $\beta$ | $\langle\tau\rangle$ (ns) |
|-----------------|---------------|---------|---------------------------|
| 180             | 1.07          | 0.468   | 2.44                      |
| 200             | 2.36          | 0.617   | 3.43                      |
| 220             | 3.07          | 0.679   | 4.01                      |
| 240             | 3.54          | 0.698   | 4.49                      |
| 260             | 4.18          | 0.719   | 5.16                      |
| 280             | 4.65          | 0.738   | 5.61                      |
| 300             | 4.89          | 0.748   | 5.83                      |

$\langle\tau\rangle$  is the average lifetime of the stretched exponential decay process:  $\langle\tau\rangle = \frac{\tau_0}{\beta} \Gamma(\frac{1}{\beta})$ .

**Table S4** The formation energy  $\Delta H$  (eV) of isolated point defects in  $Y_2Ti_2O_5S_2$  at different chemical potentials A, B, C, D, E, F, and G.

| Defect                                                                                                                                                                                                                                                                                                        | $V_O$                                                                      | $V_S$ | $V_Y$ | $V_{Ti}$ | $O_i(1)$ | $O_i(2)$ | $S_i$ | $Y_i$ | $Ti_i$ | $O_s$ | $S_o$ | $Y_{Ti}$ | $Ti_Y$ |
|---------------------------------------------------------------------------------------------------------------------------------------------------------------------------------------------------------------------------------------------------------------------------------------------------------------|----------------------------------------------------------------------------|-------|-------|----------|----------|----------|-------|-------|--------|-------|-------|----------|--------|
| <b>S rich</b>                                                                                                                                                                                                                                                                                                 |                                                                            |       |       |          |          |          |       |       |        |       |       |          |        |
|                                                                                                                                                                                                                                                                                                               | <i>A: <math>\mu_Y=-6.09, \mu_{Ti}=-4.94, \mu_S=0, \mu_O=-2.65</math></i>   |       |       |          |          |          |       |       |        |       |       |          |        |
| $\Delta H_f^x$                                                                                                                                                                                                                                                                                                | 2.964                                                                      | 3.644 | 5.555 | 7.021    | 3.467    | 2.666    | 2.898 | 6.376 | 5.308  | 0.935 | 1.524 | 0.789    | 2.507  |
|                                                                                                                                                                                                                                                                                                               | <i>B: <math>\mu_Y=-6.31, \mu_{Ti}=-5.08, \mu_S=0, \mu_O=-2.51</math></i>   |       |       |          |          |          |       |       |        |       |       |          |        |
| $\Delta H_f^x$                                                                                                                                                                                                                                                                                                | 3.104                                                                      | 3.644 | 5.335 | 6.881    | 3.327    | 2.526    | 2.898 | 6.596 | 5.448  | 0.795 | 1.664 | 0.869    | 2.427  |
|                                                                                                                                                                                                                                                                                                               | <i>C: <math>\mu_Y=-6.00, \mu_{Ti}=-3.87, \mu_S=0, \mu_O=-3.12</math></i>   |       |       |          |          |          |       |       |        |       |       |          |        |
| $\Delta H_f^x$                                                                                                                                                                                                                                                                                                | 2.494                                                                      | 3.644 | 5.645 | 8.091    | 3.937    | 3.136    | 2.898 | 6.286 | 4.238  | 1.405 | 1.054 | 1.769    | 1.527  |
|                                                                                                                                                                                                                                                                                                               | <i>D: <math>\mu_Y=-5.82, \mu_{Ti}=-3.87, \mu_S=0, \mu_O=-3.19</math></i>   |       |       |          |          |          |       |       |        |       |       |          |        |
| $\Delta H_f^x$                                                                                                                                                                                                                                                                                                | 2.424                                                                      | 3.644 | 5.825 | 8.091    | 4.007    | 3.206    | 2.898 | 6.106 | 4.238  | 1.475 | 0.984 | 1.589    | 1.707  |
| <b>S poor</b>                                                                                                                                                                                                                                                                                                 |                                                                            |       |       |          |          |          |       |       |        |       |       |          |        |
|                                                                                                                                                                                                                                                                                                               | <i>G: <math>\mu_Y=-2.49, \mu_{Ti}=0, \mu_S=-2.54, \mu_O=-5.05</math></i>   |       |       |          |          |          |       |       |        |       |       |          |        |
| $\Delta H_f^x$                                                                                                                                                                                                                                                                                                | 0.564                                                                      | 1.104 | 9.155 | 11.961   | 5.867    | 5.066    | 5.438 | 2.776 | 0.368  | 0.795 | 1.664 | 2.129    | 1.167  |
|                                                                                                                                                                                                                                                                                                               | <i>E: <math>\mu_Y=-3.90, \mu_{Ti}=-1.8, \mu_S=-1.5, \mu_O=-4.18</math></i> |       |       |          |          |          |       |       |        |       |       |          |        |
| $\Delta H_f^x$                                                                                                                                                                                                                                                                                                | 1.434                                                                      | 2.144 | 7.745 | 10.161   | 4.997    | 4.196    | 4.398 | 4.186 | 2.168  | 0.965 | 1.494 | 1.739    | 1.557  |
|                                                                                                                                                                                                                                                                                                               | <i>F: <math>\mu_Y=-5.00, \mu_{Ti}=-2.8, \mu_S=-0.5, \mu_O=-3.74</math></i> |       |       |          |          |          |       |       |        |       |       |          |        |
| $\Delta H_f^x$                                                                                                                                                                                                                                                                                                | 1.874                                                                      | 3.144 | 6.645 | 9.161    | 4.557    | 3.756    | 3.398 | 5.286 | 3.168  | 1.525 | 0.934 | 1.839    | 1.457  |
| <p>A, B, C, D, and G are all chemical potential edge points. A, B, C, and D are shown in Fig. 6b and G is shown in Fig. S7. E and F are two points randomly selected within the stable region. The red dashed rectangle highlights the relatively low formation energy of defects under S-rich condition.</p> |                                                                            |       |       |          |          |          |       |       |        |       |       |          |        |
